# Supplementary material
Source: PubMed Central journal article supplement (PMC4002361)

## Supporting Information

**Figure S1.** Single turnover reactions under anaerobic conditions. When the absence of the initial enzyme-AHQ complex at 532 nm occurs, it is a result of its low extinction coefficient. **A.** Active site variant H154N. Representative spectra at time points: 0.2, 0.6, 1, 1.0, 1.6, 3.2, 4.8, 6, 7, 9, 10.2, 11.6, 13, 15, 17.5, 20, 22.5, 26, 31.5, 37, and 42.5 min. **B.** Active site variant R179S. Representative spectra at time points: 0.2, 1, 1.8, 2.6, 4.2, 5.8, 7.4, 9.8, 12.2, 14.6, 20, 26, 32, 38, 46, 54, and 60 min.

**Figure S2.** Anaerobic to aerobic transitions. The 338 nm peak decreases as the 318 nm peak increases. H154N. Representative spectra at time points: 0.2, 0.6, 1.2, 1.8, 3, 4.2, 5.4, 6.6, 7.8, 9, 10.2, 11.4, 12.6, 13.8, 15, 18, 21, 24, 27, and 30 min.

**Figure S3.** Single turnover reactions under aerobic conditions. **A.** H154N. Representative spectra at time points: 0, 0.6, 1.2, 1.8, 3, 4.2, 5.4, 6.6, 7.8, 9, 10.8, 12.6, 14.4, 18, 22.5, 28.5, 34.5, 39, 45 min. **B.** R179S. Representative spectra at time points: 0.2, 0.6, 1, 1.4, 2.6, 3.4, 4, 6, 8, 10, 12.2, 14.2, 19, 22.5, 27, 32, 37, and 42.5 min.

**Figure S4.** Binding of PQQ to mutant enzymes. **A.** H154N  $K_D$ . Binding curve of PQQ (20 nM) to H154N form of PqqC as determined by fluorescence spectroscopy. Data yielded a  $K_D$  of 0.66 nM. **B.** Y175S  $K_D$ . Binding curve of PQQ (20 nM) to Y175S form of PqqC as determined by fluorescence spectroscopy. Data yielded a  $K_D$  of 12.23 nM.

**Figure S5.** PQQH<sub>2</sub> reoxidation to PQQ in the presence of O<sub>2</sub> core mutants. **A.** H154N.  
**B.** Y175S.

Figure S1

A.

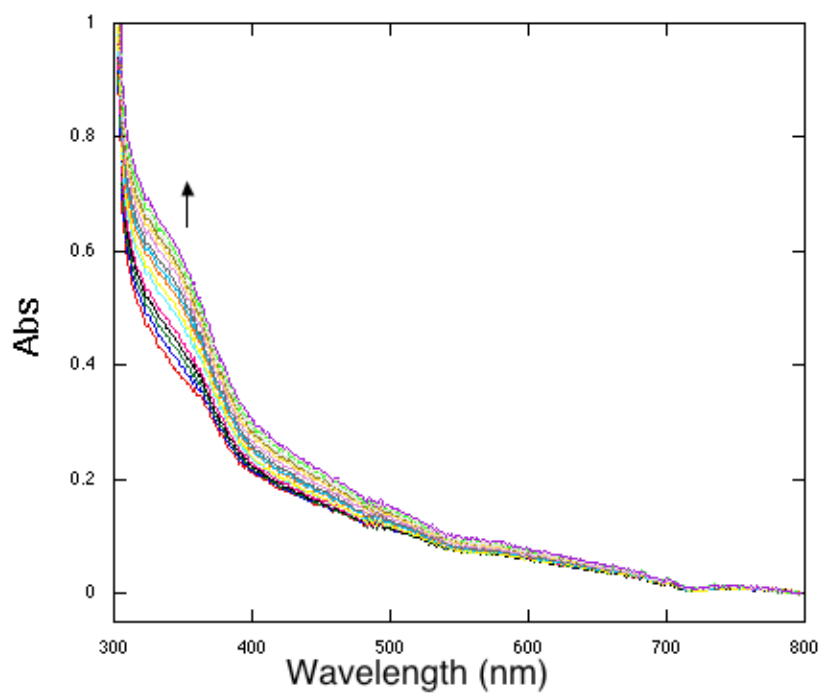

B.

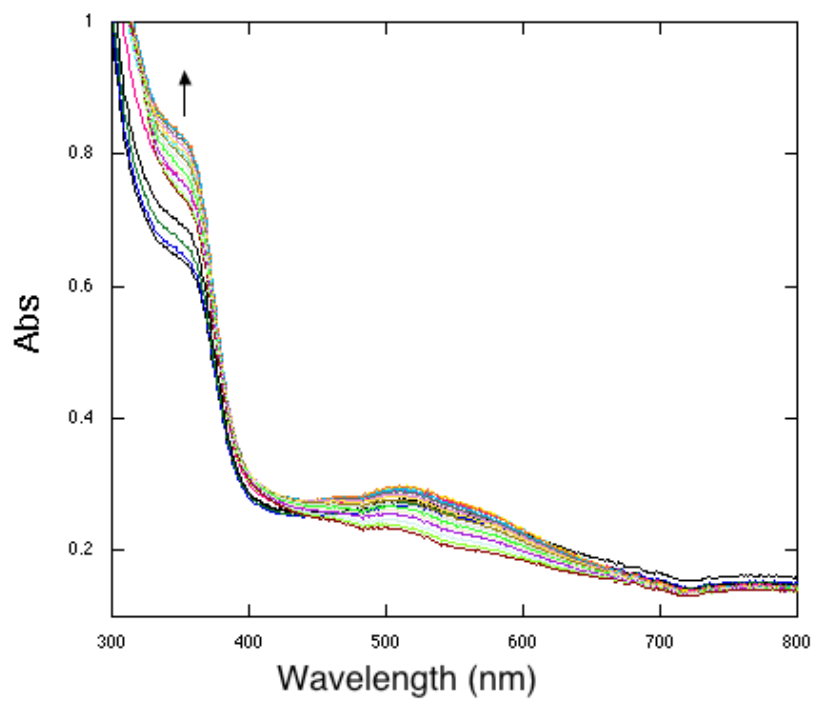

Figure S2

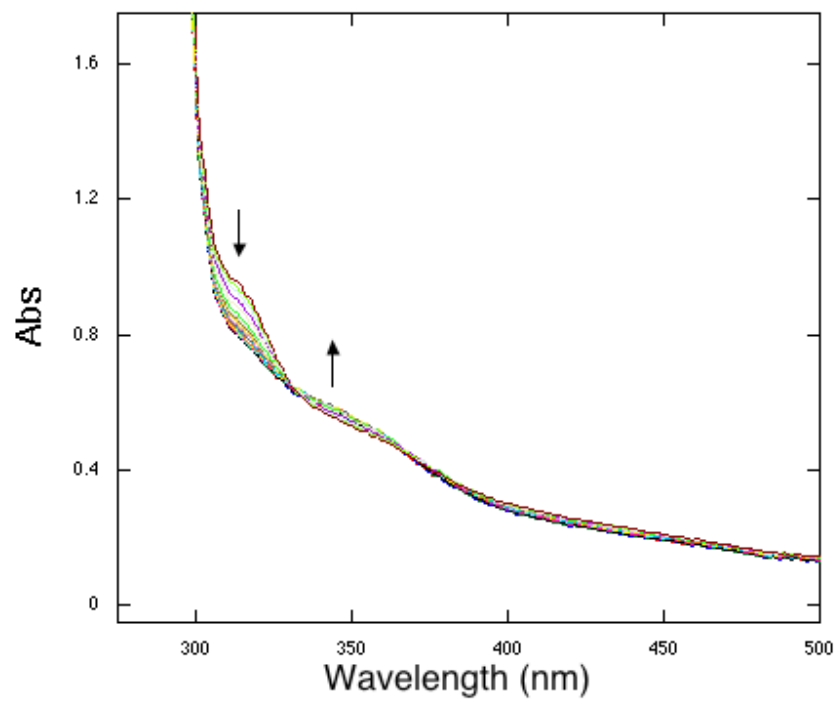

**Figure S3**

**A.**

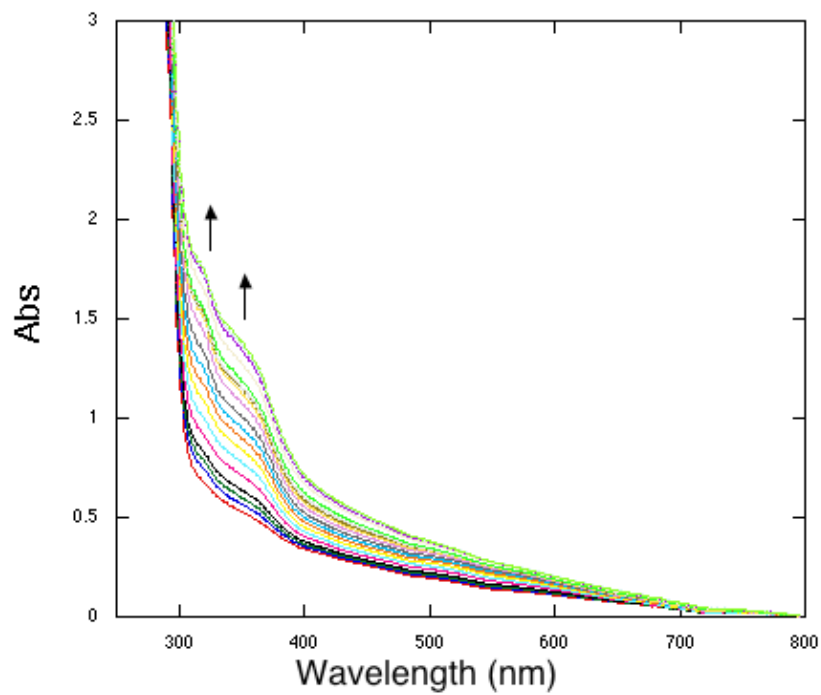

**B.**

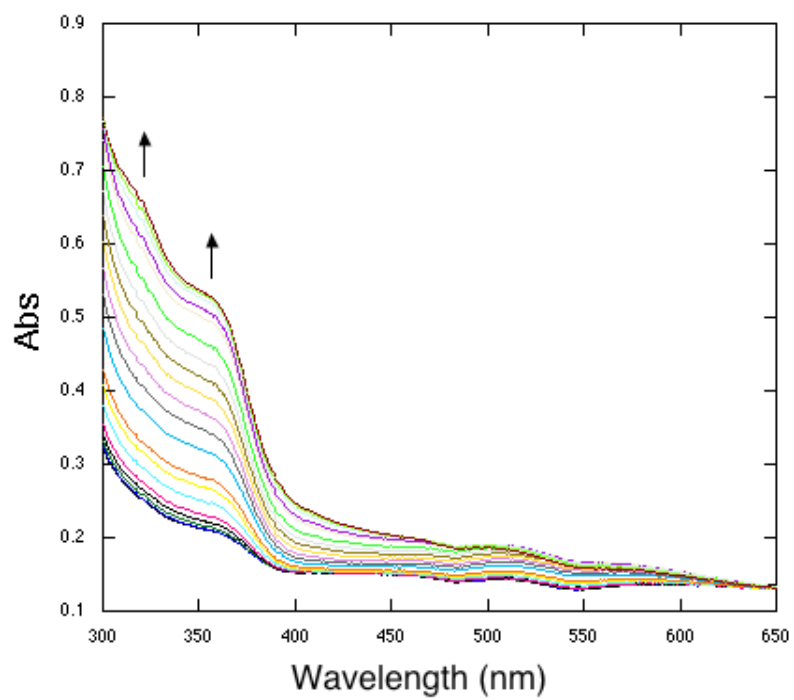

**Figure S4**

**A.**

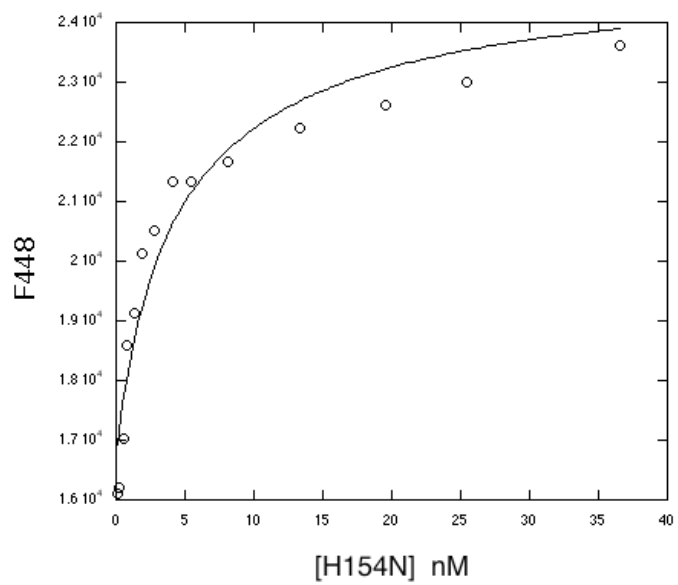

**B.**

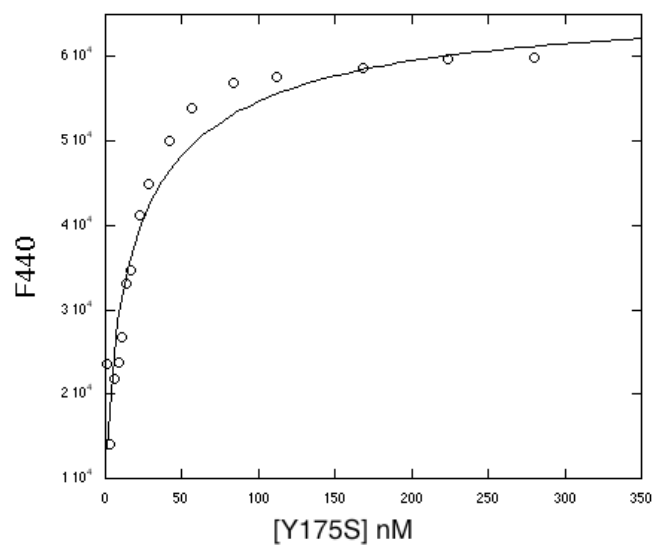

Figure S5

A.

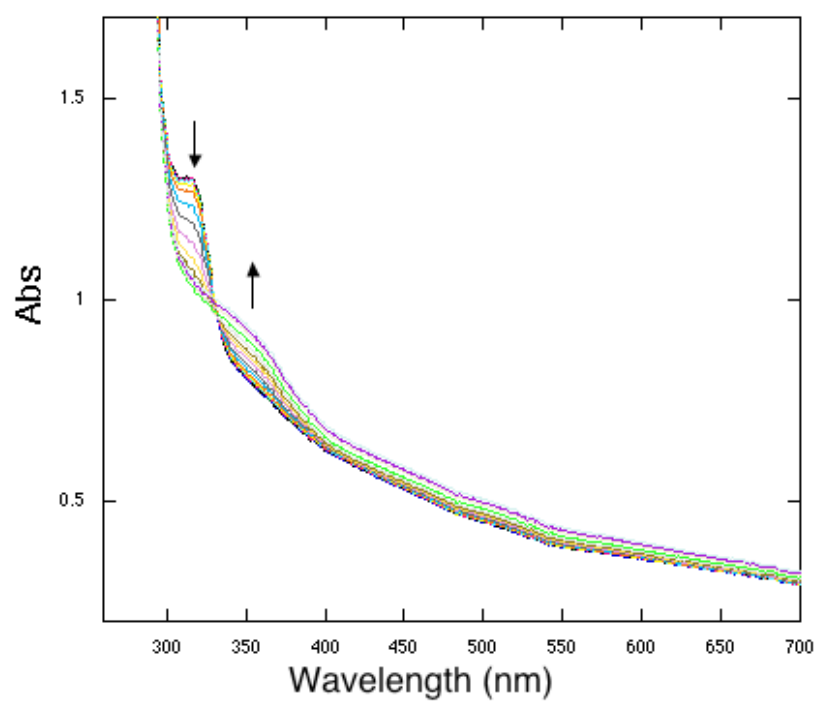

B.

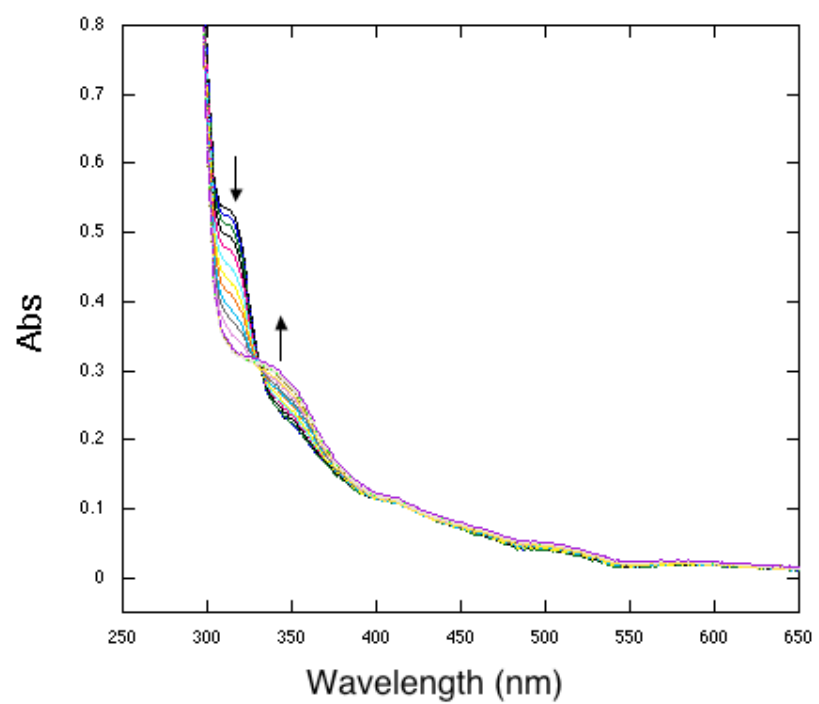

Supplement: NIHMS273914-supplement-1_si_001.pdf [file NIHMS273914-supplement-1_si_001.pdf]
